# Supplementary material for: CSN5A Subunit of COP9 Signalosome Is Required for Resetting Transcriptional Stress Memory after Recurrent Heat Stress in Arabidopsis
Source: MDPI journal article supplement (doi:10.3390/biom11050668), 2021-04-30
Supplement: s1 [file s1]

**Table S1: Primers used in this research work**

| <b>Gene</b>      | <b>Primer sequence 5'- 3' for qRT-PCR</b>      |                        |
|------------------|------------------------------------------------|------------------------|
| <i>APX2 F</i>    | CTTGATGATCCTCTCTTTCTCCCA                       |                        |
| <i>APX2 R</i>    | ACTCCTTGTCAGCAAACCCGAG                         |                        |
| <i>HSP22 F</i>   | ATTCTGGAGACAGTTCAAGCTACCT                      |                        |
| <i>HSP22 R</i>   | TTCAGGAGATAGTTTCGTGAGGTTA                      |                        |
| <i>HSP70 F</i>   | CCGTCTTCGATGCTAAGCGTCT                         |                        |
| <i>HSP70 R</i>   | AACCACAATCATAGGCTTCTCACC                       |                        |
| <i>ACTIN 8 F</i> | CACTTTCCAGCAGATGTGGATC                         |                        |
| <i>ACTIN 8 R</i> | AATGCCTGGACCTGCTTCAT                           |                        |
|                  |                                                |                        |
|                  | <b>Primers sequence 5'-3' for Histone ChIP</b> | <b>Amplicon region</b> |
| <i>APX2 F</i>    | GGATATCAAACCCAACCTGAAGAGAG                     | 1                      |
| <i>APX2 R</i>    | ATAATCTGAGCAAAAGATAAAACACGG                    | 1                      |
| <i>APX2 F</i>    | CTGTTCCCTATTCTGTCATATGCTG                      | 2                      |
| <i>APX2 R</i>    | ACCCTTGATTCTATGGTTCTACCTC                      | 2                      |
| <i>HSP22 F</i>   | CGTTGGACTTGGCCTTAGAT                           | 1                      |
| <i>HSP22 R</i>   | TGACTGCTCCCTGATTCTTG                           | 1                      |
| <i>HSP22 F</i>   | ATGAAGCACTTGCTAAGCATCTTC                       | 2                      |
| <i>HSP22 R</i>   | AGTCCTAATGGGATTCTCTCCA                         | 2                      |
| <i>HSP70 F</i>   | TCAAAAGGGGTCTACGAAA                            | 1                      |
| <i>HSP70 R</i>   | GCACCACACGTTTTCAAGGT                           | 1                      |
| <i>HSP70 F</i>   | CCACTCTTCATTCATATATAAACA                       | 2                      |
| <i>HSP70 R</i>   | ATTCGTCTGTGAGCTTTAAGAG                         | 2                      |
